# Supplementary material
Source: MDPI journal article supplement (https://www.mdpi.com/2076-3417/15/5/2360)
Supplement: s1 [file applsci-3458432-supplementary.pdf › applsci-3458432-supplementary.pdf]

Table S1. Composition of standard hens feed mixture.

| Component             | Participation in the diet (%) |
|-----------------------|-------------------------------|
| corn                  | 40.81                         |
| soybean meal          | 18.50                         |
| toasted soybean       | 8.30                          |
| triticale             | 15.00                         |
| sunflower meal        | 1.65                          |
| Alfa alfa             | 1.00                          |
| Livestock yeast       | 0.50                          |
| limestone             | 9.36                          |
| Monocalcium phosphate | 1.56                          |
| Salt for animals      | 0.32                          |
| Synthetic Methionin   | 0.24                          |
| Sunflower oil         | 2.26                          |
| Premix*               | 0.50                          |
| <b>total</b>          | <b>100</b>                    |

\*composition of Premix (content per kg): vitamin A 200000 UI, vitamin D 3 500000 UI, vitamin E 10000 mg, vitamin K 3 600 mg, vitamin B 1 400 mg, vitamin B 2 1000 mg, vitamin B 6 1000 mg, vitamin B 12 3000 µg, vitamin C 4000 mg, vitamin H 12 mg, vitamin B3 8000 mg, vitamin B 5 2400 mg, vitamin B9 150 mg, vitamin B4 100000 mg, iodine 200 mg, manganese 18000 mg, zinc 14000 mg, cobalt 30 mg, iron 12000 mg, copper 1600 mg, selenium inorganic 50 mg, calcium 238 g, phytase 100000 FYT, canthaxanthin 500 mg, beta-apo-beta-carotenoic acid 300 mg, antioxidant (butylhydroxytoluene) 20000 mg
